# Supplementary material
Source: ML conference proceedings conference paper supplement (https://aclanthology.org/2020.icon-main.15)
Supplement: OptionalSupplementaryMaterial [file 2020.icon-main.15.OptionalSupplementaryMaterial.zip]

## A Unique utterance counts, intent counts and labels counts for pseudo Golden and Rare data.

| Domain   | Utterance Group | Unique Utterance Count | Unique Intent Count | Unique Label Count |
|----------|-----------------|------------------------|---------------------|--------------------|
| alarm    | pseudo Goldens  | 202                    | 6                   | 3                  |
| alarm    | Rare            | 7006                   | 6                   | 7                  |
| reminder | pseudo Goldens  | 513                    | 3                   | 7                  |
| reminder | Rare            | 5580                   | 3                   | 7                  |
| weather  | pseudo Goldens  | 228                    | 3                   | 5                  |
| weather  | Rare            | 10929                  | 3                   | 8                  |

## B Summary of the results on Language Bootstrapping Experiments averaged over three runs for Generator with sentence-level reward.

| Metric                  | Domain   | Baseline    |             | Generator with sentence-level reward with Monte Carlo rollout |             |          |             |          |  |
|-------------------------|----------|-------------|-------------|---------------------------------------------------------------|-------------|----------|-------------|----------|--|
|                         |          | TopX        |             | Unique                                                        |             | All      |             |          |  |
|                         |          | Performance | Performance | % change                                                      | Performance | % change | Performance | % change |  |
| Domain accuracy         |          | 96.83       | 97.71       | +0.91                                                         | 95.5        | -1.37    | 95.17       | -1.72    |  |
| Intent accuracy         | alarm    | 73.33       | 68.53       | -6.54                                                         | 79.98       | +9.07    | 80.46       | +9.73    |  |
|                         | reminder | 72.93       | 81.72       | +12.06                                                        | 79.63       | +9.19    | 79.39       | +8.85    |  |
|                         | weather  | 97.5        | 97.58       | +0.08                                                         | 97.72       | +0.23    | 98.65       | +1.18    |  |
| Overall intent accuracy |          | 84          | 84.89       | +1.05                                                         | 87.96       | +4.71    | 88.4        | +5.24    |  |
| Slot F1                 | alarm    | 92.63       | 91.8        | -0.89                                                         | 92.54       | -0.09    | 93.11       | +0.52    |  |
|                         | reminder | 83.49       | 84.79       | +1.55                                                         | 84.72       | +1.47    | 83.61       | +0.14    |  |
|                         | weather  | 83.63       | 82.55       | -1.29                                                         | 83.2        | -0.52    | 83.63       | +0.00    |  |
| Overall slot F1         |          | 86.19       | 85.88       | -0.36                                                         | 86.08       | -0.12    | 86.07       | -0.14    |  |
| Overall frame accuracy  |          | 46.44       | 45.64       | -1.73                                                         | 46.53       | +0.19    | 46.51       | +0.16    |  |

  

| Metric                  | Domain   | Baseline    |             | Generator with sentence-level reward without rollouts |             |          |             |          |  |
|-------------------------|----------|-------------|-------------|-------------------------------------------------------|-------------|----------|-------------|----------|--|
|                         |          | TopX        |             | Unique                                                |             | All      |             |          |  |
|                         |          | Performance | Performance | % change                                              | Performance | % change | Performance | % change |  |
| Domain accuracy         |          | 96.83       | 94.62       | -2.28                                                 | 97.6        | +0.80    | 96.58       | -0.26    |  |
| Intent accuracy         | alarm    | 73.33       | 73.89       | +0.77                                                 | 79.77       | +8.78    | 83.93       | +14.45   |  |
|                         | reminder | 72.93       | 74.71       | +2.44                                                 | 87.53       | +20.02   | 85.62       | +17.40   |  |
|                         | weather  | 97.5        | 97.64       | +0.14                                                 | 97.8        | +0.31    | 97.76       | +0.27    |  |
| Overall intent accuracy |          | 84          | 84.21       | +0.25                                                 | 89.86       | +6.98    | 90.56       | +7.81    |  |
| Slot F1                 | alarm    | 92.63       | 91.48       | -1.24                                                 | 89.92       | -2.93    | 91.53       | -1.19    |  |
|                         | reminder | 83.49       | 80.64       | -3.41                                                 | 86.09       | +3.11    | 84.5        | +1.21    |  |
|                         | weather  | 83.63       | 84.62       | +1.18                                                 | 81.78       | -2.21    | 81.32       | -2.77    |  |
| Overall slot F1         |          | 86.19       | 85.33       | -1.00                                                 | 85.33       | -1.00    | 85.13       | -1.23    |  |
| Overall frame accuracy  |          | 46.44       | 46.01       | -0.93                                                 | 45.66       | -1.69    | 44.38       | -4.43    |  |

## C Summary of the results on Language Bootstrapping Experiments averaged over three runs for Generator with token-level reward.

| Metric                  | Domain   | Baseline |       | Generator with token-level reward |       |          |       |          |       |          |       | Upsampled |       |          |  |
|-------------------------|----------|----------|-------|-----------------------------------|-------|----------|-------|----------|-------|----------|-------|-----------|-------|----------|--|
|                         |          | TopX     |       | Uniques                           |       | All      |       | TopX     |       | Uniques  |       | All       |       |          |  |
|                         |          | Perf.    | Perf. | % change                          | Perf. | % change | Perf. | % change | Perf. | % change | Perf. | % change  | Perf. | % change |  |
| Domain accuracy         |          | 96.83    | 94.08 | -2.84                             | 96.49 | -0.35    | 97.11 | +0.29    | 95.41 | -1.47    | 97.05 | +0.23     | 97.50 | +0.70    |  |
| Intent accuracy         | alarm    | 73.33    | 75.04 | +2.33                             | 81.26 | +10.81   | 82.01 | +11.84   | 70.30 | -4.13    | 78.38 | +6.88     | 81.26 | +10.82   |  |
|                         | reminder | 72.93    | 70.64 | -3.14                             | 81.40 | +11.61   | 83.60 | +14.62   | 74.30 | +1.87    | 80.07 | +9.79     | 82.47 | +13.08   |  |
|                         | weather  | 97.5     | 97.29 | -0.21                             | 92.38 | -5.25    | 93.71 | -3.89    | 98.06 | +0.58    | 99.00 | +1.53     | 99.02 | +1.56    |  |
| Overall intent accuracy |          | 84       | 83.33 | -0.80                             | 86.26 | +2.69    | 87.70 | +4.41    | 83.40 | -0.71    | 88.06 | +4.84     | 89.64 | +6.72    |  |
| Slot F1                 | alarm    | 92.63    | 92.77 | +0.15                             | 91.68 | -1.03    | 91.66 | -1.04    | 91.58 | -1.13    | 92.40 | -0.25     | 92.70 | +0.08    |  |
|                         | reminder | 83.49    | 79.36 | -4.95                             | 84.23 | +0.89    | 84.16 | +0.80    | 82.28 | -1.45    | 84.48 | +1.18     | 84.87 | +1.65    |  |
|                         | weather  | 83.63    | 84.30 | +0.80                             | 84.26 | +0.75    | 84.68 | +1.25    | 83.80 | +0.21    | 83.40 | -0.27     | 82.94 | -0.83    |  |
| Overall Slot F1         |          | 86.19    | 85.12 | -1.24                             | 86.37 | +0.20    | 86.53 | +0.39    | 85.56 | -0.73    | 86.28 | +0.10     | 86.26 | +0.09    |  |
| Overall frame accuracy  |          | 46.44    | 46.61 | +0.38                             | 46.81 | +0.80    | 47.95 | +3.26    | 45.47 | -2.08    | 47.86 | +3.05     | 48.47 | +4.37    |  |

  

| Metric                  | Domain   | Baseline |       | Generator with token-level Monte Carlo rollout |       |          |       |          |                 |         |          | Upsampled |          |       |          |
|-------------------------|----------|----------|-------|------------------------------------------------|-------|----------|-------|----------|-----------------|---------|----------|-----------|----------|-------|----------|
|                         |          | TopX     |       | Uniques                                        |       | All      |       | TopX     |                 | Uniques |          | All       |          |       |          |
|                         |          | Perf.    | Perf. | % change                                       | Perf. | % change | Perf. | % change | [SAME AS ABOVE] | Perf.   | % change | Perf.     | % change | Perf. | % change |
| Domain accuracy         |          | 96.83    | 94.06 | -2.86                                          | 97.22 | +0.41    | 94.86 | -2.03    |                 | 97.81   | +1.02    | 96.18     | -0.67    |       |          |
| Intent accuracy         | alarm    | 73.33    | 70.10 | -4.41                                          | 84.20 | +14.83   | 82.63 | +12.68   |                 | 77.35   | +5.48    | 80.65     | +9.98    |       |          |
|                         | reminder | 72.93    | 71.34 | -2.18                                          | 83.45 | +14.43   | 77.58 | +6.38    |                 | 83.39   | +14.35   | 79.49     | +9.00    |       |          |
|                         | weather  | 97.5     | 97.33 | -0.17                                          | 97.38 | -0.12    | 97.44 | -0.06    |                 | 98.95   | +1.48    | 99.14     | +1.69    |       |          |
| Overall intent accuracy |          | 84       | 81.86 | -2.55                                          | 90.06 | +7.21    | 87.67 | +4.36    |                 | 88.64   | +5.53    | 88.61     | +5.49    |       |          |
| Slot F1                 | alarm    | 92.63    | 90.94 | -1.82                                          | 92.23 | -0.43    | 90.28 | -2.53    |                 | 92.05   | -0.63    | 92.15     | -0.52    |       |          |
|                         | reminder | 83.49    | 79.79 | -4.43                                          | 85.85 | +2.82    | 81.87 | -1.94    |                 | 85.45   | +2.35    | 83.94     | +0.54    |       |          |
|                         | weather  | 83.63    | 85.39 | +2.10                                          | 83.84 | +0.25    | 84.94 | +1.56    |                 | 82.62   | -1.21    | 83.56     | -0.09    |       |          |
| Overall Slot F1         |          | 86.19    | 85.33 | -1.00                                          | 86.77 | +0.67    | 85.57 | -0.73    |                 | 86.12   | -0.08    | 86.10     | -0.10    |       |          |
| Overall frame accuracy  |          | 46.44    | 45.36 | -2.33                                          | 48.44 | +4.30    | 47.75 | +2.82    |                 | 47.70   | +2.71    | 48.73     | +4.92    |       |          |

## D Summary of the results on Low-Resource Domain Experiments averaged over three runs. Pre-trained embeddings were built using robust domains and used in GAN model with token-level reward to inform the data generation for the low-resource domain.

| ALARM AS LOW-RESOURCE DOMAIN    |          |             |                                                |          |                                                           |          |
|---------------------------------|----------|-------------|------------------------------------------------|----------|-----------------------------------------------------------|----------|
| Metric                          | Domain   | Baseline    | Pre-trained embeddings with token-level reward |          | Pre-trained embeddings with MC rollout token-level reward |          |
|                                 |          | Performance | Performance                                    | % change | Performance                                               | % change |
| Domain accuracy                 |          | 99.19       | 99.13                                          | -0.06    | 99.21                                                     | +0.03    |
| Intent accuracy                 | alarm    | 74.75       | 84.07                                          | +12.46   | 85.32                                                     | +14.14   |
|                                 | reminder | 97.70       | 97.89                                          | +0.20    | 97.98                                                     | +0.29    |
|                                 | weather  | 99.10       | 98.86                                          | -0.24    | 99.24                                                     | +0.14    |
| Overall intent accuracy         |          | 91.56       | 94.26                                          | +2.95    | 94.81                                                     | +3.54    |
| Slot F1                         | alarm    | 93.00       | 91.34                                          | -1.79    | 92.46                                                     | -0.58    |
|                                 | reminder | 92.79       | 92.70                                          | -0.10    | 92.79                                                     | +0.00    |
|                                 | weather  | 97.79       | 97.78                                          | -0.01    | 97.86                                                     | +0.07    |
| Overall Slot F1                 |          | 95.13       | 94.64                                          | -0.52    | 95.00                                                     | -0.13    |
| Overall frame accuracy          |          | 73.95       | 74.14                                          | +0.27    | 74.57                                                     | +0.84    |
| REMINDER AS LOW-RESOURCE DOMAIN |          |             |                                                |          |                                                           |          |
| Metric                          | Domain   | Baseline    | Pre-trained embeddings with token-level reward |          | Pre-trained embeddings with MC rollout token-level reward |          |
|                                 |          | Performance | Performance                                    | % change | Performance                                               | % change |
| Domain accuracy                 |          | 99.68       | 99.57                                          | -0.12    | 99.40                                                     | -0.28    |
| Intent accuracy                 | alarm    | 96.75       | 96.80                                          | +0.05    | 96.59                                                     | -0.16    |
|                                 | reminder | 80.81       | 91.48                                          | +13.21   | 93.24                                                     | +15.39   |
|                                 | weather  | 99.75       | 99.57                                          | -0.18    | 99.37                                                     | -0.38    |
| Overall intent accuracy         |          | 94.56       | 96.90                                          | +2.47    | 97.15                                                     | +2.74    |
| Slot F1                         | alarm    | 96.29       | 96.32                                          | +0.03    | 96.24                                                     | -0.05    |
|                                 | reminder | 87.90       | 87.63                                          | -0.31    | 88.00                                                     | +0.11    |
|                                 | weather  | 97.96       | 97.83                                          | -0.14    | 97.84                                                     | -0.13    |
| Overall Slot F1                 |          | 94.94       | 94.82                                          | -0.13    | 94.92                                                     | -0.02    |
| Overall frame accuracy          |          | 75.70       | 76.05                                          | +0.46    | 76.16                                                     | +0.61    |
| WEATHER AS LOW-RESOURCE DOMAIN  |          |             |                                                |          |                                                           |          |
| Metric                          | Domain   | Baseline    | Pre-trained embeddings with token-level reward |          | Pre-trained embeddings with MC rollout token-level reward |          |
|                                 |          | Performance | Performance                                    | % change | Performance                                               | % change |
| Domain accuracy                 |          | 96.64       | 95.46                                          | -1.22    | 96.55                                                     | -0.09    |
| Intent accuracy                 | alarm    | 92.66       | 89.94                                          | -2.93    | 91.64                                                     | -1.10    |
|                                 | reminder | 92.30       | 91.63                                          | -0.72    | 93.30                                                     | +1.08    |
|                                 | weather  | 97.73       | 97.80                                          | +0.08    | 98.23                                                     | +0.51    |
| Overall intent accuracy         |          | 94.75       | 93.64                                          | -1.18    | 94.86                                                     | +0.12    |
| Slot F1                         | alarm    | 94.57       | 92.92                                          | -1.74    | 93.75                                                     | -0.86    |
|                                 | reminder | 89.25       | 88.82                                          | -0.49    | 90.09                                                     | +0.94    |
|                                 | weather  | 84.72       | 84.36                                          | -0.42    | 83.13                                                     | -1.87    |
| Overall Slot F1                 |          | 89.02       | 88.32                                          | -0.78    | 88.38                                                     | -0.71    |
| Overall frame accuracy          |          | 60.38       | 59.04                                          | -2.22    | 58.29                                                     | -3.46    |

## E Data quality evaluation results.

| Model                                                         | Pre-trained embeddings | Domain   | Unique utterances | Unique words | Mean utterance length | BLEU1 | BLEU2 | BLEU3 | BLEU4 |
|---------------------------------------------------------------|------------------------|----------|-------------------|--------------|-----------------------|-------|-------|-------|-------|
| Generator with sentence-level reward without rollouts         | No                     | alarm    | 1183              | 113          | 5.49                  | 96.76 | 91.23 | 82.38 | 61.45 |
|                                                               |                        | reminder | 2792              | 539          | 6.23                  | 94.64 | 85.51 | 73.44 | 60.9  |
|                                                               |                        | weather  | 1378              | 104          | 5.33                  | 99.77 | 96.03 | 90.78 | 81.44 |
| Generator with sentence-level reward with Monte Carlo rollout | No                     | alarm    | 1064              | 111          | 5.73                  | 97.91 | 94.37 | 88.72 | 77.1  |
|                                                               |                        | reminder | 3487              | 540          | 6.75                  | 95.1  | 84.83 | 70.99 | 53.93 |
|                                                               |                        | weather  | 1839              | 105          | 5.59                  | 99.65 | 91.98 | 85.06 | 75.22 |
| Generator with token-level reward                             | No                     | alarm    | 2350              | 122          | 6.24                  | 94.7  | 87.49 | 78.17 | 66.12 |
|                                                               |                        | reminder | 4729              | 580          | 6.78                  | 98.97 | 85.71 | 69.35 | 54.98 |
|                                                               |                        | weather  | 1479              | 108          | 5.45                  | 99.62 | 96.13 | 91.16 | 86.33 |
| Generator with token-level Monte Carlo rollout                | No                     | alarm    | 2123              | 123          | 6.11                  | 96.29 | 90.32 | 75.79 | 62.03 |
|                                                               |                        | reminder | 5144              | 593          | 6.52                  | 99.01 | 87.03 | 67.57 | 49.29 |
|                                                               |                        | weather  | 1975              | 109          | 5.44                  | 99.22 | 95.09 | 87.75 | 76.11 |
| Generator with token-level reward                             | Yes                    | alarm    | 2545              | 116          | 6.07                  | 94.59 | 83.96 | 75.01 | 65.82 |
|                                                               |                        | reminder | 7048              | 572          | 7.07                  | 98.03 | 79.2  | 58.34 | 41.35 |
|                                                               |                        | weather  | 1323              | 104          | 5.59                  | 99.64 | 89.51 | 83.89 | 74.8  |
| Generator with token-level Monte Carlo rollout                | Yes                    | alarm    | 3451              | 112          | 7.22                  | 91.45 | 80.24 | 69.59 | 56.38 |
|                                                               |                        | reminder | 6128              | 586          | 6.58                  | 96.08 | 78.14 | 58.32 | 39.87 |
|                                                               |                        | weather  | 2291              | 108          | 5.43                  | 98.08 | 87.39 | 75.49 | 58.32 |
